# Supplementary material
Source: Elsevier journal article supplement (https://www.sciencedirect.com/science/article/pii/S1888429616300565)
Supplement: mmc1 [file S1888429616300565:mmc1.docx]

# Appendix 1: Delphi questionnaire used in Round 1

# Appendix 2: Delphi questionnaire used in Round 2
